# Supplementary material for: Deuterated hydrazino-s-triazine as highly-efficient labelling reagent for glycan relative quantification analysis using electrospray ionization mass spectrometry
Source: Royal Society of Chemistry journal article supplement (doi:10.1039/c5ra12005e), 2015-01-01
Supplement: c5ra12005e1.pdf [file c5ra12005e1.pdf]

**Electronic Supplementary Information**

**Deuterated Hydrazino-s-triazine as highly-efficient  
labeling reagent for N-Glycans Relative  
Quantification Analysis by using Electrospray  
Ionization Mass Spectrometry**

Ming-Zhe Zhao,<sup>a</sup> Cai Tie,<sup>b</sup> Yi-Wei Zhang,<sup>a</sup> Yan Deng,<sup>a</sup> Fang-Ting Zhang,<sup>a</sup> Ying-Lin Zhou,<sup>a\*</sup> Xin-  
Xiang Zhang<sup>a\*</sup>

*a. Beijing National Laboratory for Molecular Sciences (BNLMS), Key Laboratory of Biochemistry and  
Molecular Engineering of Ministry of Education, Institute of Analytical Chemistry, College of Chemistry,  
Peking University, Beijing, 100871, China.*

*b. State Key Laboratory of Bioactive Substance and Function of Natural Medicines, Institute of  
MateriaMedica, Peking Union Medical College & Chinese Academy of Medical Sciences, Beijing  
100050, China*

*\* Corresponding author.*

*\*E-mail: zhouyl@pku.edu.cn. Phone: +86-10-62754112. Fax: +86-10-62754112.*

*\*E-mail: zxx@pku.edu.cn. Phone: 86-10-62754680. Fax: 86-10-62754680.*

## **Contents**

- **Experimental Section**

  - Synthesis of labelling reagents**

    - General

    - Materials

    - Synthesis details

- **Tables and Figures**

- **References**

## Experimental Section

### Synthesis of labelling reagents.

#### General

$^1\text{H}$  NMR and  $^{13}\text{C}$  NMR spectra were recorded on Bruker AVANCE III 500 NMR spectrometer at 500 and 125 MHz, respectively. Chemical shifts ( $\delta$ ) were reported in ppm and respectively referenced to internal standard tetramethylsilane (TMS) and solvent signals (TMS, 0 ppm for  $^1\text{H}$  NMR and  $\text{CDCl}_3$ , 77.0 ppm for  $^{13}\text{C}$  NMR). HRMS data were recorded on Thermo Q-Exactive mass spectrometer. Silica gel (200-300 mesh) was used for flash column chromatography, eluting with ethyl acetate/ petroleum ether mixture.

#### Materials

Cyanuric chloride (98%) was purchased from Alfa Aesar. Diisopropylethylamine (99%) was purchased from J&K Chemicals. Diethylamine (A. R.), hydrochloric acid (A. R.), hydrazine hydrate (85%, A. R.), petroleum ether (bp: 60~90 °C, A. R.), ethyl acetate (A. R.), tetrahydrofuran (A. R.), dichloromethane (A. R.), sodium chloride (A. R.), potassium hydroxide (A. R.) and sodium sulfate anhydrous (A. R.) were all purchased from Beijing Tong Guang Fine Chemicals Company.  $\text{D}_{11}$ -diethylamine (isotopic purity 99.6%) was purchased from CDN isotopes (Quebec, Canada).

## Synthesis of 2-hydrazino-4,6-bis-(diethylamino)-s-triazine (denoted as HDEAT)<sup>1</sup>

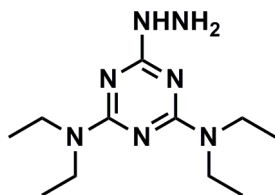

Diisopropylethylamine (5.16 mL, 29.81 mmol) and diethylamine (3.07 mL, 29.81 mmol) in dichloromethane (10 mL) was added dropwise to a suspension of cyanuric chloride (2.5 g, 13.55 mmol) in dichloromethane (50 mL) under ice-cooling for 1 h. The reaction mixture was stirred for 24 h and slowly returned to room temperature. Then, it was washed with 2 mol/L HCl and brine. The organic layer was dried over anhydrous Na<sub>2</sub>SO<sub>4</sub> and concentrated under vacuum to afford crude product, which was chromatographed on silica gel with petroleum ether-ethyl acetate (20:1) to obtain pure intermediate. 85% hydrazine hydrate (4 mL) was added dropwise to intermediate solution in THF (50 mL). The reaction mixture was heated to reflux overnight. After cooling, KOH (2.1 g) in H<sub>2</sub>O (20 mL) was added and stirred for 15 min. Then, it was extracted with dichloromethane. The organic layer was dried over anhydrous Na<sub>2</sub>SO<sub>4</sub> and concentrated under vacuum to afford a crude product, which was recrystallized from a mixture of petroleum ether and diethyl ether to give pure product. <sup>1</sup>H NMR (500 MHz, CDCl<sub>3</sub>) δ: 5.88 (s, 1H), 3.91 (s, 2H), 3.54 (q, *J*=7.0 Hz, 8H), 1.14 (t, *J*=7.0Hz, 12H). <sup>13</sup>C NMR (125 MHz, CDCl<sub>3</sub>) δ: 169.0, 164.5, 41.0, 13.4. HRMS-ESI calcd for [M+H]<sup>+</sup> 254.2088; found: 254.2081

**Synthesis of 2-hydrazino-4,6-bis-(d<sub>10</sub>-diethylamino)-s-triazine (denoted as d<sub>20</sub>-HDEAT)**

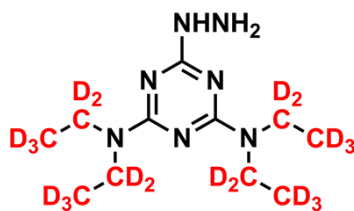

The synthetic route of d<sub>20</sub>-HDEAT was the same as HDEAT except the replacement of diethylamine by d<sub>11</sub>-diethylamine. <sup>1</sup>H NMR (500 MHz, CDCl<sub>3</sub>) δ 5.77 (s, 1H), 3.91 (s, 2H). <sup>13</sup>C NMR (125 MHz, CDCl<sub>3</sub>) δ 168.96, 164.51, 40.14, 12.33. HRMS-ESI calcd for [M+H]<sup>+</sup> 274.3343; found: 274.3341

## Tables and Figures

Table S1 The intergrated peak areas of HDEAT and d<sub>20</sub>-HDEAT labelled glycans from human serum and glycan abundance ratios.

| Glycan Compositions                                                      | Peak Area<br>of<br>HDEAT<br>Labelled<br>Glycans | Peak area of<br>d <sub>20</sub> -HDEAT<br>labelled<br>Glycans | Glycan<br>Abundance<br>Ratio | Glycan<br>Abundance Ratio<br>(Corrected by<br>Internal Standard) |
|--------------------------------------------------------------------------|-------------------------------------------------|---------------------------------------------------------------|------------------------------|------------------------------------------------------------------|
| Hex <sub>7</sub> (internal standard)                                     | 3.98E+06                                        | 3.68E+06                                                      | 1.08                         | 1.00                                                             |
| Hex <sub>3</sub> HexNac <sub>3</sub>                                     | 1.18E+06                                        | 1.06E+06                                                      | 1.11                         | 1.03                                                             |
| Hex <sub>3</sub> HexNac <sub>4</sub>                                     | 1.80E+06                                        | 1.69E+06                                                      | 1.07                         | 0.99                                                             |
| Hex <sub>3</sub> HexNac <sub>5</sub>                                     | 7.98E+06                                        | 7.86E+06                                                      | 1.02                         | 0.94                                                             |
| Hex <sub>3</sub> HexNac <sub>3</sub> Fuc <sub>1</sub>                    | 8.88E+06                                        | 8.10E+06                                                      | 1.10                         | 1.01                                                             |
| Hex <sub>3</sub> HexNac <sub>4</sub> Fuc <sub>1</sub>                    | 1.37E+08                                        | 1.27E+08                                                      | 1.08                         | 1.00                                                             |
| Hex <sub>3</sub> HexNac <sub>5</sub> Fuc <sub>1</sub>                    | 3.72E+07                                        | 3.22E+07                                                      | 1.16                         | 1.07                                                             |
| Hex <sub>4</sub> HexNac <sub>2</sub>                                     | 6.75E+05                                        | 6.71E+05                                                      | 1.01                         | 0.93                                                             |
| Hex <sub>4</sub> HexNac <sub>3</sub>                                     | 2.48E+06                                        | 2.30E+06                                                      | 1.08                         | 1.00                                                             |
| Hex <sub>4</sub> HexNac <sub>4</sub>                                     | 1.68E+07                                        | 1.54E+07                                                      | 1.09                         | 1.01                                                             |
| Hex <sub>4</sub> HexNac <sub>5</sub>                                     | 9.35E+06                                        | 9.32E+06                                                      | 1.00                         | 0.93                                                             |
| Hex <sub>4</sub> HexNac <sub>3</sub> Fuc <sub>1</sub>                    | 1.77E+06                                        | 1.58E+06                                                      | 1.12                         | 1.04                                                             |
| Hex <sub>4</sub> HexNac <sub>4</sub> Fuc <sub>1</sub>                    | 3.02E+08                                        | 2.65E+08                                                      | 1.14                         | 1.05                                                             |
| Hex <sub>4</sub> HexNac <sub>5</sub> Fuc <sub>1</sub>                    | 7.68E+07                                        | 6.60E+07                                                      | 1.16                         | 1.08                                                             |
| Hex <sub>4</sub> HexNac <sub>3</sub> NeuAc <sub>1</sub>                  | 5.98E+05                                        | 5.52E+05                                                      | 1.08                         | 1.00                                                             |
| Hex <sub>4</sub> HexNac <sub>4</sub> NeuAc <sub>1</sub>                  | 1.44E+06                                        | 1.31E+06                                                      | 1.10                         | 1.02                                                             |
| Hex <sub>4</sub> HexNac <sub>5</sub> NeuAc <sub>1</sub>                  | 2.94E+05                                        | 2.85E+05                                                      | 1.03                         | 0.95                                                             |
| Hex <sub>4</sub> HexNac <sub>3</sub> Fuc <sub>1</sub> NeuAc <sub>1</sub> | 1.68E+05                                        | 1.60E+05                                                      | 1.05                         | 0.97                                                             |
| Hex <sub>5</sub> HexNac <sub>2</sub>                                     | 6.20E+07                                        | 5.33E+07                                                      | 1.16                         | 1.08                                                             |
| Hex <sub>5</sub> HexNac <sub>3</sub>                                     | 4.34E+06                                        | 4.36E+06                                                      | 1.00                         | 0.92                                                             |
| Hex <sub>5</sub> HexNac <sub>4</sub>                                     | 2.22E+07                                        | 2.04E+07                                                      | 1.09                         | 1.01                                                             |
| Hex <sub>5</sub> HexNac <sub>5</sub>                                     | 4.79E+06                                        | 4.10E+06                                                      | 1.17                         | 1.08                                                             |
| Hex <sub>5</sub> HexNac <sub>3</sub> Fuc <sub>1</sub>                    | 2.98E+06                                        | 2.61E+06                                                      | 1.14                         | 1.06                                                             |
| Hex <sub>5</sub> HexNac <sub>4</sub> Fuc <sub>1</sub>                    | 2.09E+08                                        | 1.89E+08                                                      | 1.11                         | 1.03                                                             |
| Hex <sub>5</sub> HexNac <sub>4</sub> Fuc <sub>2</sub>                    | 1.21E+07                                        | 1.16E+07                                                      | 1.04                         | 0.96                                                             |
| Hex <sub>5</sub> HexNac <sub>5</sub> Fuc <sub>1</sub>                    | 3.07E+07                                        | 2.65E+07                                                      | 1.16                         | 1.07                                                             |
| Hex <sub>5</sub> HexNac <sub>5</sub> Fuc <sub>2</sub>                    | 2.47E+06                                        | 2.39E+06                                                      | 1.03                         | 0.96                                                             |
| Hex <sub>5</sub> HexNac <sub>6</sub> Fuc <sub>1</sub>                    | 5.11E+04                                        | 4.79E+04                                                      | 1.07                         | 0.99                                                             |
| Hex <sub>5</sub> HexNac <sub>3</sub> NeuAc <sub>1</sub>                  | 5.25E+05                                        | 5.01E+05                                                      | 1.05                         | 0.97                                                             |
| Hex <sub>5</sub> HexNac <sub>4</sub> NeuAc <sub>1</sub>                  | 1.28E+07                                        | 1.14E+07                                                      | 1.12                         | 1.04                                                             |
| Hex <sub>5</sub> HexNac <sub>5</sub> NeuAc <sub>1</sub>                  | 1.07E+06                                        | 1.01E+06                                                      | 1.06                         | 0.98                                                             |
| Hex <sub>5</sub> HexNac <sub>4</sub> Fuc <sub>1</sub> NeuAc <sub>1</sub> | 1.84E+06                                        | 1.73E+06                                                      | 1.06                         | 0.99                                                             |
| Hex <sub>5</sub> HexNac <sub>5</sub> Fuc <sub>1</sub> NeuAc <sub>1</sub> | 6.74E+05                                        | 6.54E+05                                                      | 1.03                         | 0.95                                                             |
| Hex <sub>6</sub> HexNac <sub>2</sub>                                     | 4.61E+07                                        | 4.43E+07                                                      | 1.04                         | 0.96                                                             |

|                                                         |          |          |      |      |
|---------------------------------------------------------|----------|----------|------|------|
| Hex <sub>6</sub> HexNac <sub>3</sub>                    | 3.73E+06 | 3.60E+06 | 1.04 | 0.96 |
| Hex <sub>6</sub> HexNac <sub>5</sub>                    | 5.05E+05 | 4.62E+05 | 1.09 | 1.01 |
| Hex <sub>6</sub> HexNac <sub>3</sub> Fuc <sub>1</sub>   | 8.75E+05 | 8.48E+05 | 1.03 | 0.96 |
| Hex <sub>6</sub> HexNac <sub>3</sub> Fuc <sub>2</sub>   | 3.65E+05 | 3.41E+05 | 1.07 | 0.99 |
| Hex <sub>6</sub> HexNac <sub>4</sub> Fuc <sub>1</sub>   | 7.83E+05 | 7.14E+05 | 1.10 | 1.01 |
| Hex <sub>6</sub> HexNac <sub>5</sub> Fuc <sub>1</sub>   | 7.88E+05 | 7.72E+05 | 1.02 | 0.95 |
| Hex <sub>6</sub> HexNac <sub>6</sub> Fuc <sub>1</sub>   | 9.26E+04 | 8.88E+04 | 1.04 | 0.97 |
| Hex <sub>6</sub> HexNac <sub>3</sub> NeuAc <sub>1</sub> | 3.80E+05 | 3.62E+05 | 1.05 | 0.97 |
| Hex <sub>6</sub> HexNac <sub>4</sub> NeuAc <sub>1</sub> | 5.07E+04 | 4.93E+04 | 1.03 | 0.95 |
| Hex <sub>6</sub> HexNac <sub>5</sub> NeuAc <sub>1</sub> | 1.70E+05 | 1.58E+05 | 1.08 | 1.00 |
| Hex <sub>7</sub> HexNac <sub>2</sub>                    | 5.48E+06 | 4.93E+06 | 1.11 | 1.03 |
| Hex <sub>7</sub> HexNac <sub>3</sub> Fuc <sub>1</sub>   | 7.97E+05 | 7.32E+05 | 1.09 | 1.01 |
| Hex <sub>8</sub> HexNac <sub>2</sub>                    | 2.81E+06 | 2.77E+06 | 1.01 | 0.94 |
| Hex <sub>9</sub> HexNac <sub>2</sub>                    | 2.10E+06 | 1.99E+06 | 1.06 | 0.98 |
| Hex <sub>10</sub> HexNac <sub>2</sub>                   | 9.52E+04 | 8.46E+04 | 1.12 | 1.04 |

Table S2 The exact mass of the typical glycans presented in the research and their theoretical m/z of corresponding derivatives

| Glycan Compositions                                     | Exact Mass | Theoretical m/z after HDEAT lablled | Theoretical m/z after d <sub>20</sub> -HDEAT labelled | Origins                |
|---------------------------------------------------------|------------|-------------------------------------|-------------------------------------------------------|------------------------|
| maltoheptaose                                           | 1152.3803  | 1387.5803                           | 1407.5803                                             | Standard Glycan        |
| Hex <sub>4</sub> HexNac <sub>2</sub>                    | 1072.3806  | 1307.5806                           | 1327.5806                                             | Ovalbumin              |
| Hex <sub>3</sub> HexNac <sub>3</sub>                    | 1113.4072  | 1348.6072                           | 1368.6072                                             | Ovalbumin              |
| Hex <sub>5</sub> HexNac <sub>2</sub>                    | 1234.4334  | 1469.6334                           | 1489.6334                                             | Ovalbumin              |
| Hex <sub>4</sub> HexNac <sub>3</sub>                    | 1275.4600  | 1510.6600                           | 1530.6600                                             | Ovalbumin              |
| Hex <sub>6</sub> HexNac <sub>2</sub>                    | 1396.4863  | 1631.6863                           | 1651.6863                                             | Ovalbumin, Human Serum |
| Hex <sub>5</sub> HexNac <sub>4</sub>                    | 1640.5922  | 1875.7922                           | 1895.7922                                             | Human Serum            |
| Hex <sub>5</sub> HexNac <sub>4</sub> Fuc <sub>1</sub>   | 1786.6501  | 2021.8501                           | 2041.8501                                             | Human Serum            |
| Hex <sub>5</sub> HexNac <sub>4</sub> NeuAc <sub>1</sub> | 1931.6876  | 2166.8876                           | 2186.8876                                             | Human Serum            |

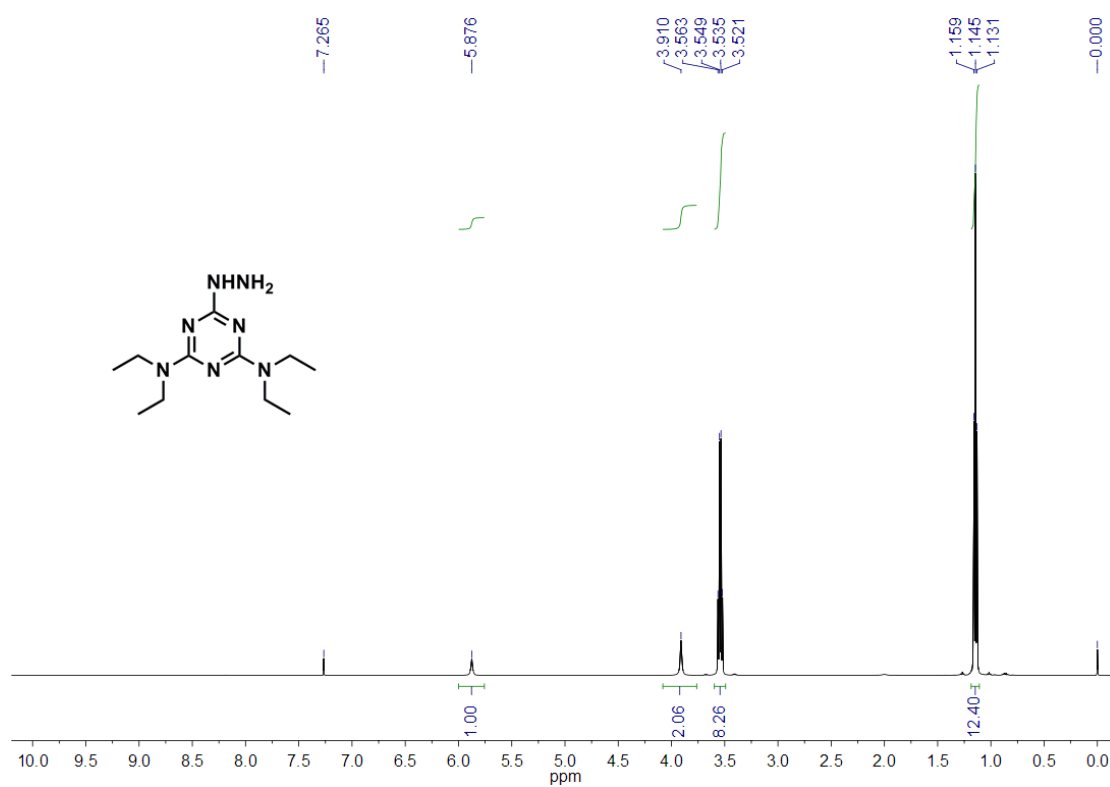

Fig. S1a. <sup>1</sup>H NMR spectrum of HDEAT<sup>1</sup>

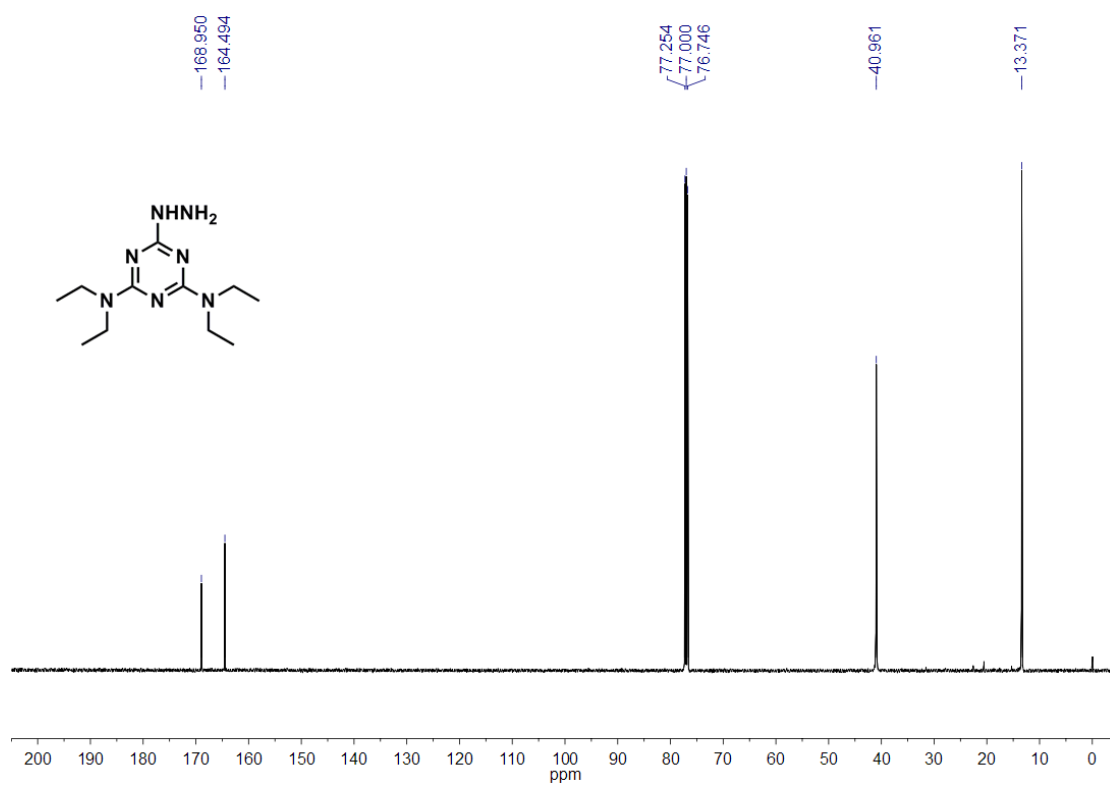

Fig. S1b. <sup>13</sup>C NMR spectrum of HDEAT<sup>1</sup>

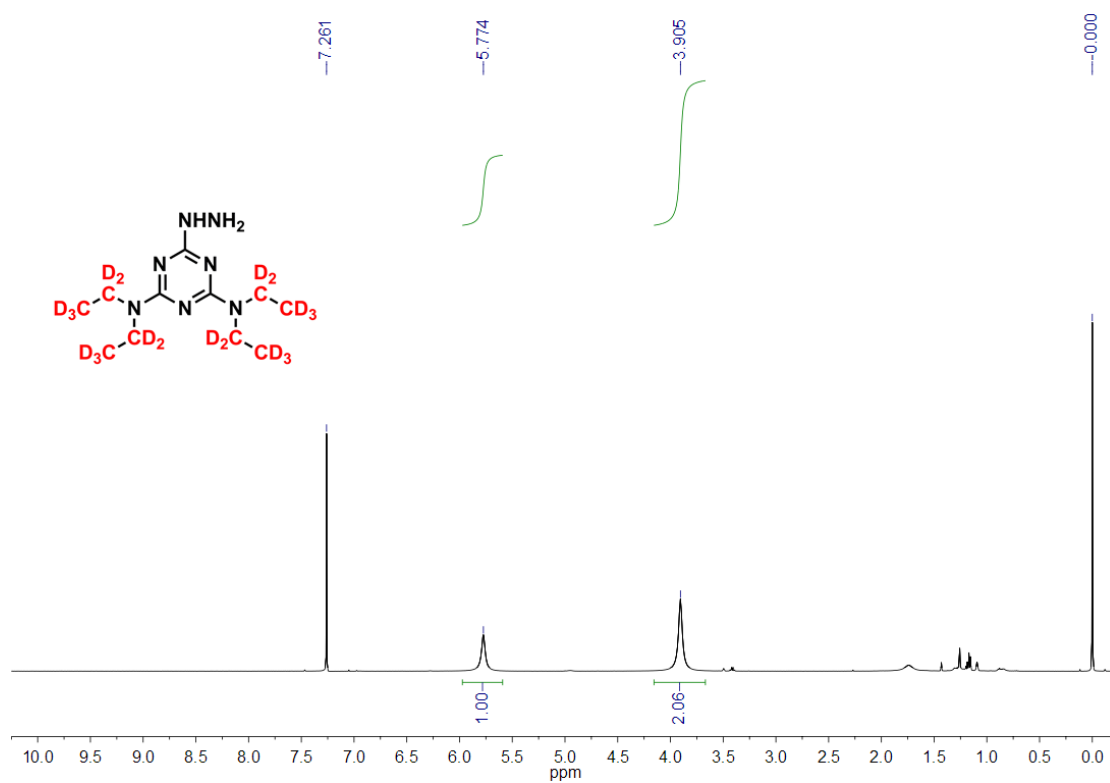

Fig. S2a.  $^1\text{H}$  NMR spectrum of  $d_{20}$ -HDEAT

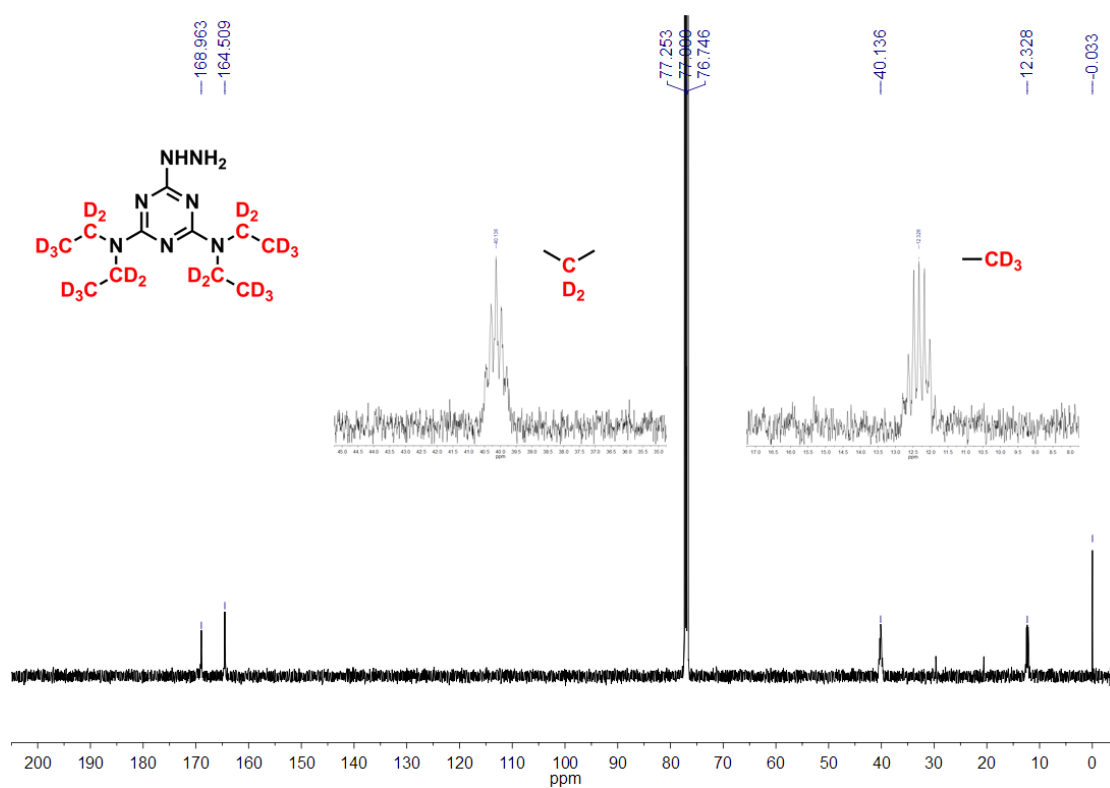

Fig. S2b.  $^{13}\text{C}$  NMR spectrum of  $d_{20}$ -HDEAT

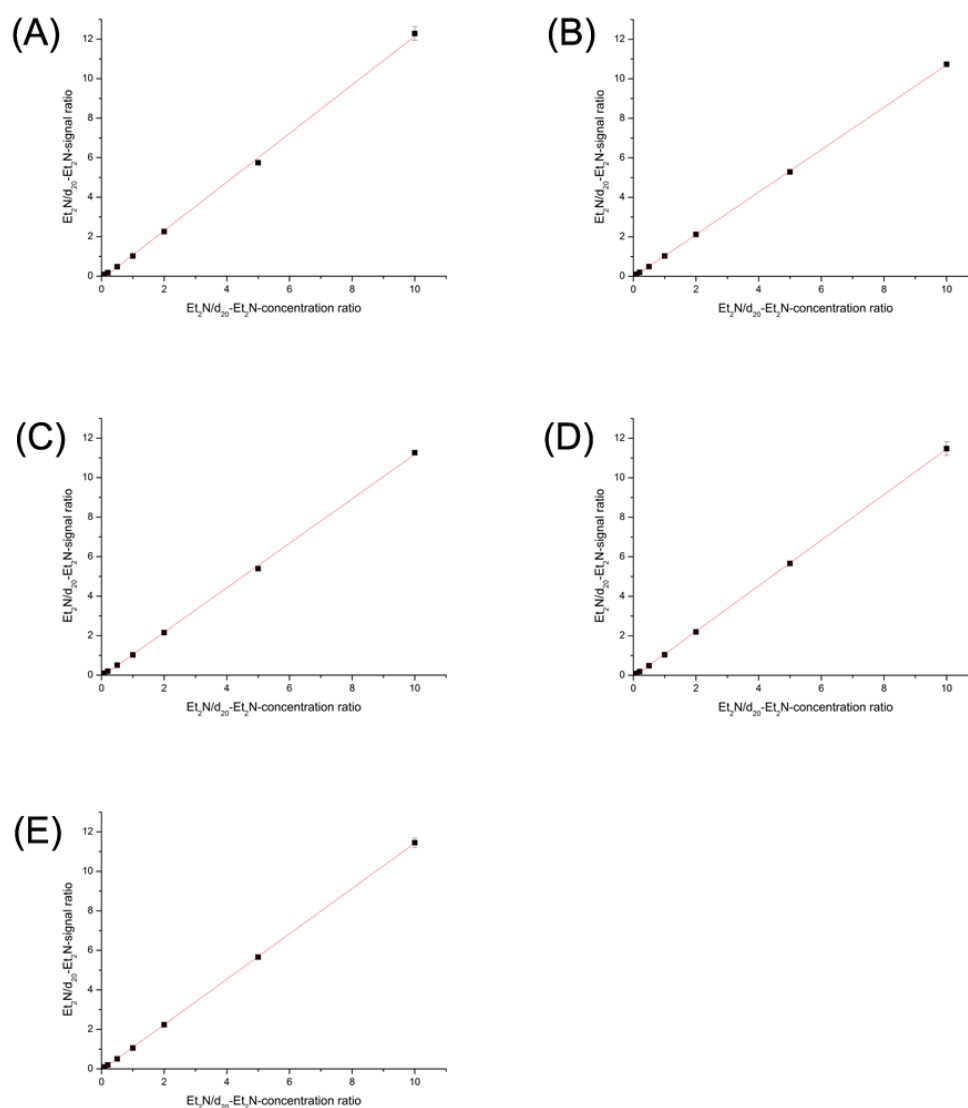

Fig. S3 Calibration curves of relative quantification analysis based on signal ratios of HDEAT and d<sub>20</sub>-HDEAT labelled N-glycan from OVA in ESI-MS and corresponding concentration ratio: (A) Hex<sub>4</sub>HexNAc<sub>2</sub>, (B) Hex<sub>3</sub>HexNAc<sub>3</sub>, (C) Hex<sub>5</sub>HexNAc<sub>2</sub>, (D) Hex<sub>4</sub>HexNAc<sub>3</sub>, (E) Hex<sub>6</sub>HexNAc<sub>2</sub>.

## References

1. M.-Z. Zhao, Y.-W. Zhang, F. Yuan, Y. Deng, J.-X. Liu, Y.-L. Zhou and X.-X. Zhang, *Talanta*, 2015, **144**, 992-997.
